# Supplementary material for: An 2-(2′-aminophenyl)benzoxazole-based OFF–ON fluorescent chemosensor for Zn2+ in aqueous solution
Source: Royal Society of Chemistry journal article supplement (doi:10.1039/c0ob00983k), 2011-01-01
Supplement: c0ob00983k.pdf [file c0ob00983k.pdf]

# An 2-(2'-aminophenyl)benzoxazole-based OFF–ON fluorescent chemosensor for $\text{Zn}^{2+}$ in aqueous solution

Maliang Chen, Xin Lv, Yunlong Liu, Yun Zhao, Jing Liu, Pi Wang and Wei Guo\*

School of Chemistry and Chemical Engineering, Shanxi University, Taiyuan 030006,  
China. Email: guow@sxu.edu.cn

## Electronic Supplementary Information (ESI†)

### Contents

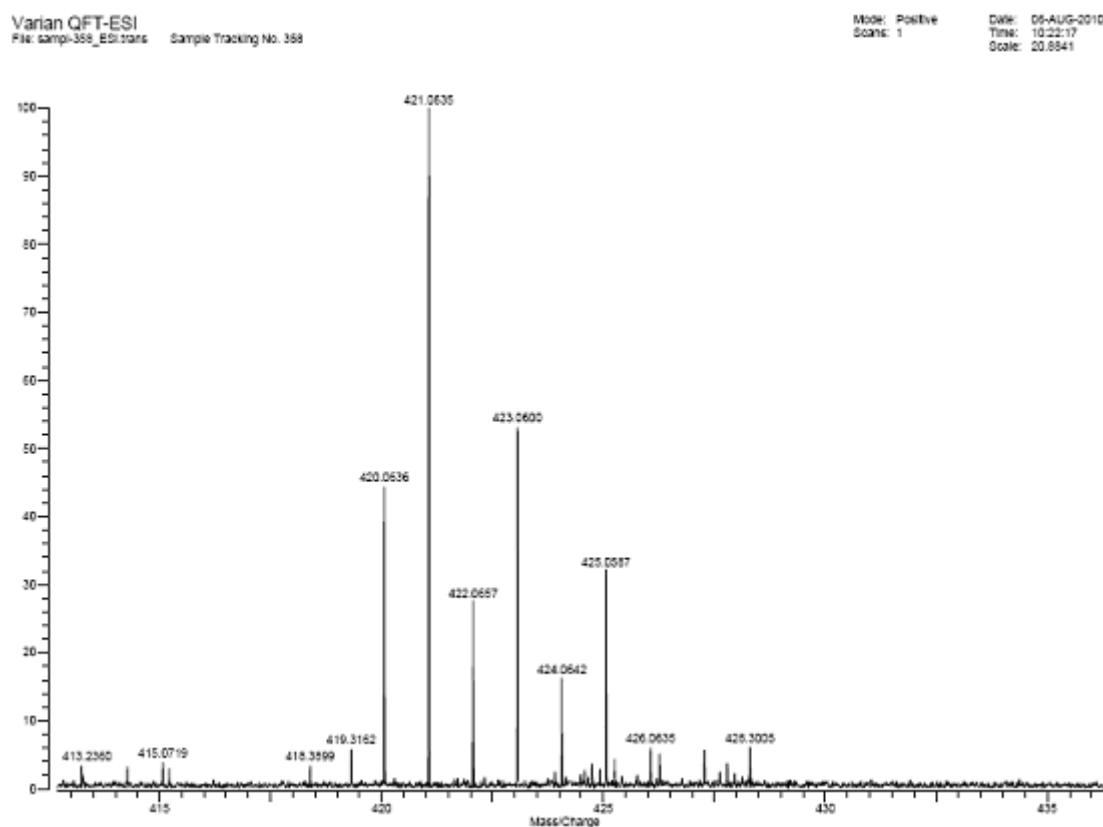

Figure S1. The ESI-MS for 1- $\text{Zn}^{2+}$ .

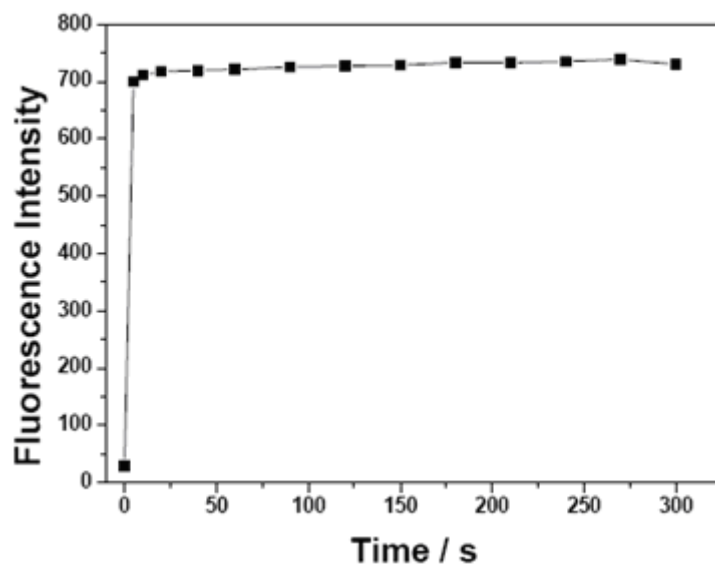

**Figure S2.** Time course of the fluorescence response of **1** (10  $\mu$ M) in Tris-HCl buffer (10 mM, pH = 7.2) upon addition of 3 equiv of  $\text{Zn}(\text{NO}_3)_2$ .

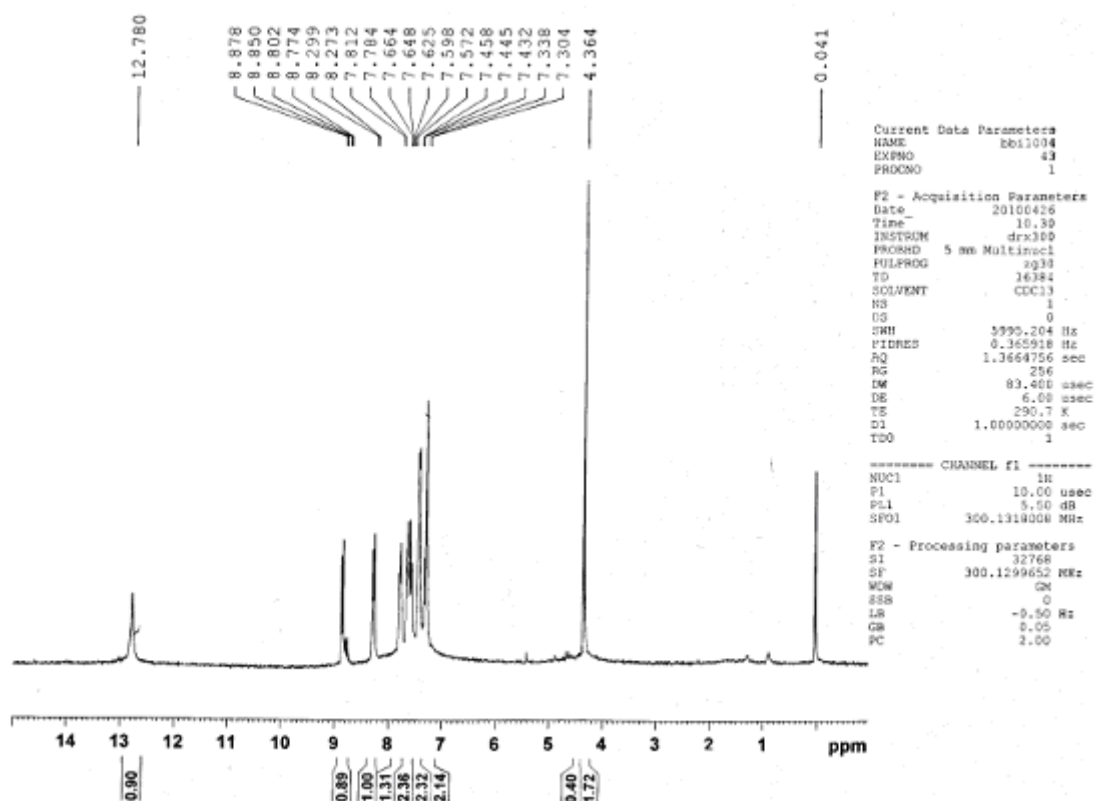

**Figure S3.** The  $^1\text{H}$  NMR spectra of **2**.

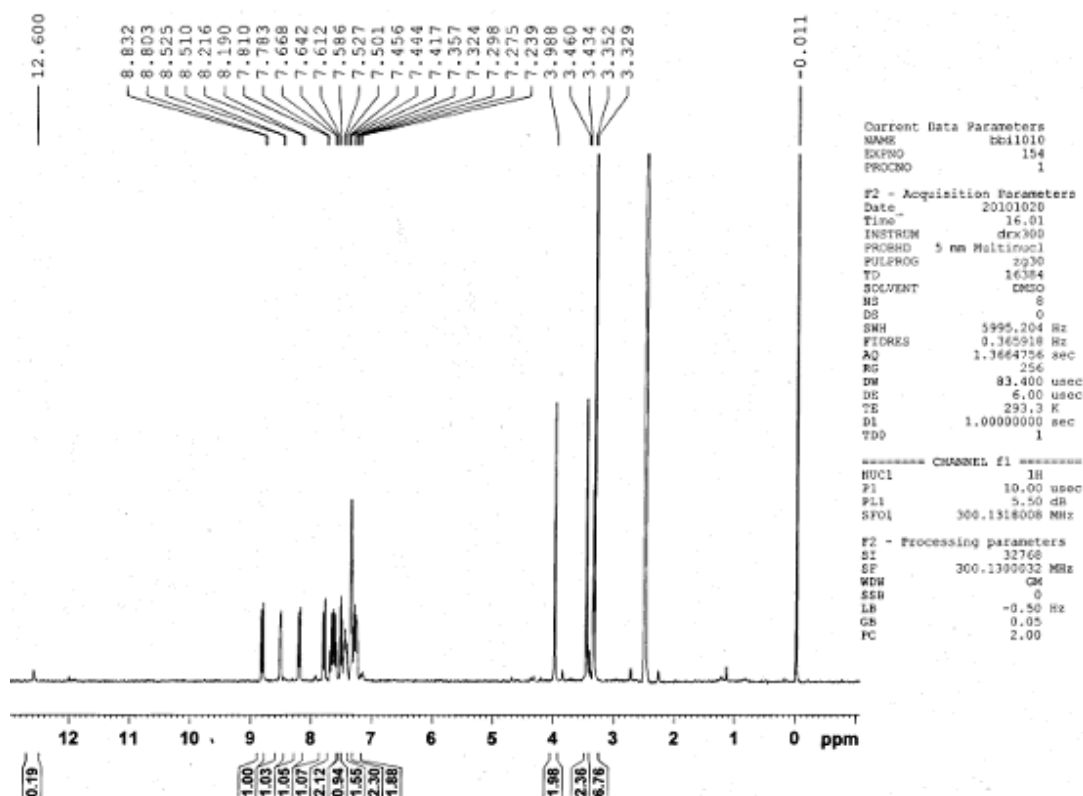

Figure S4. The  $^1\text{H}$  NMR spectra of 1.

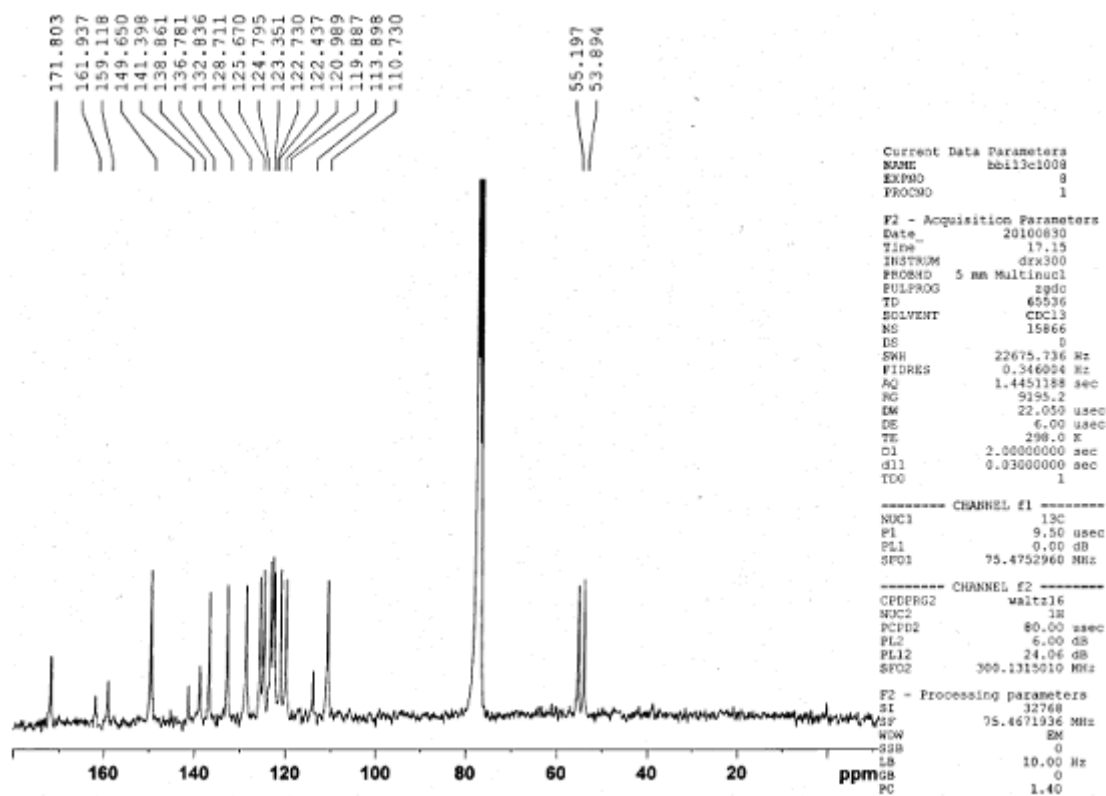

Figure S5. The  $^{13}\text{C}$  NMR spectra of 1.

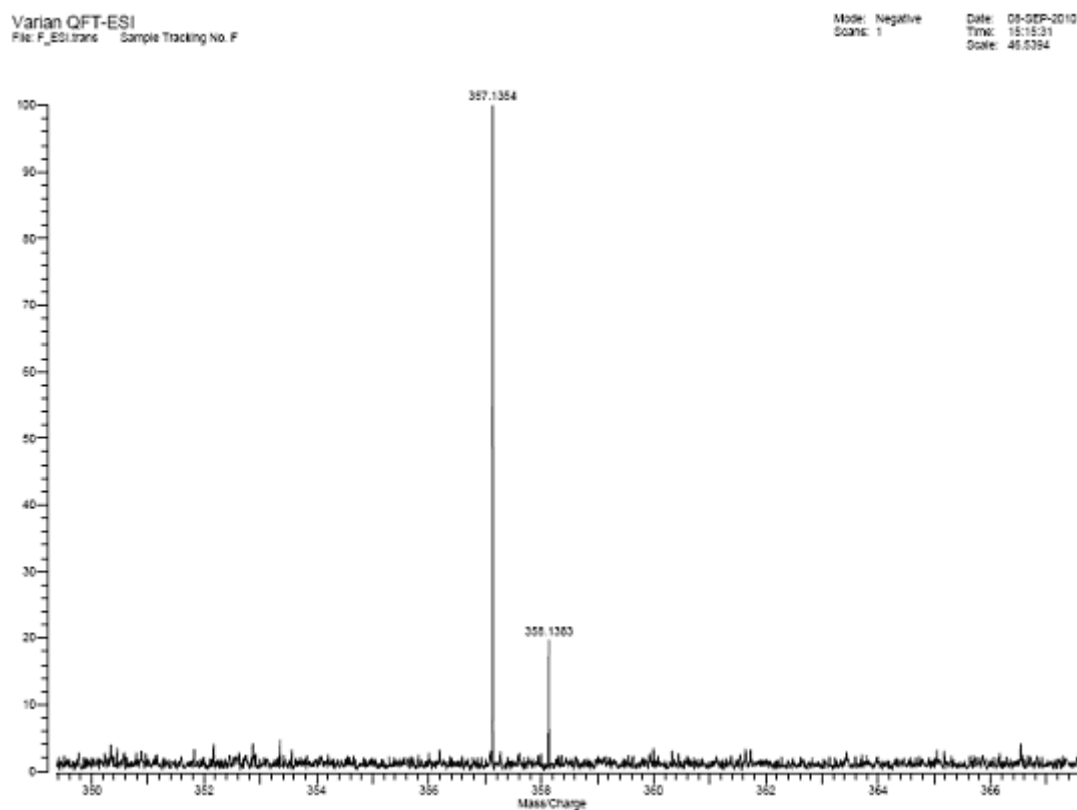

**Figure S6.** The ESI-MS for **1**.

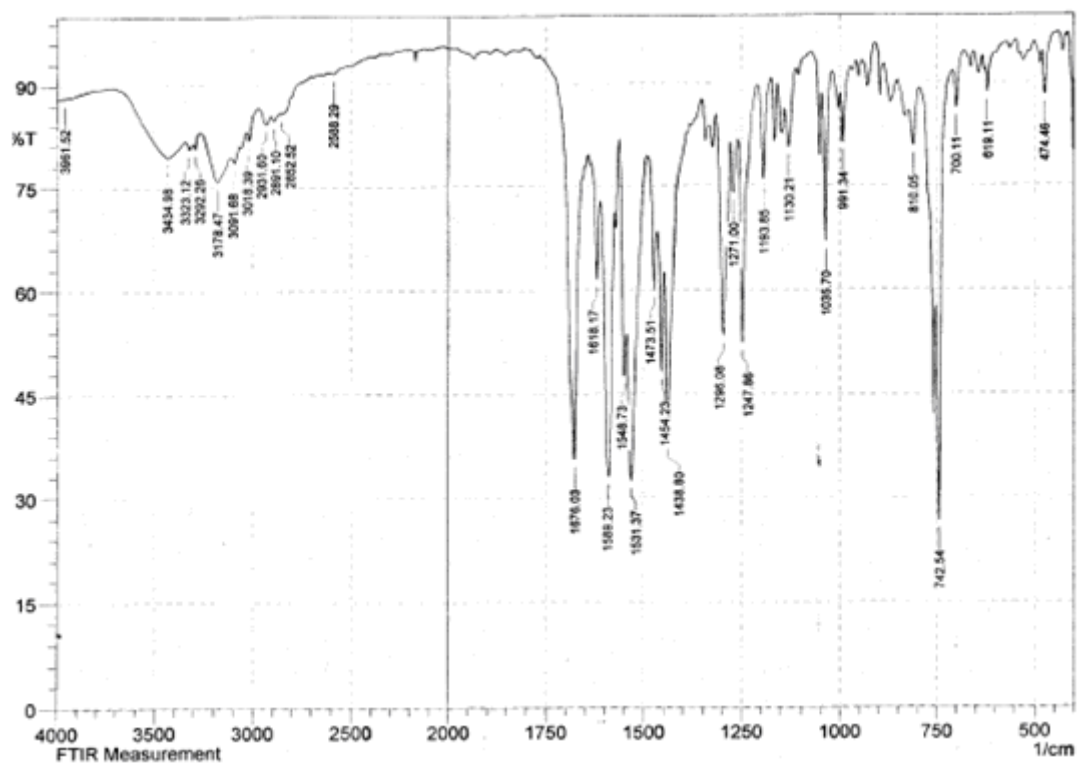

**Figure S7.** FTIR chart for **1**.
